# Supplementary material for: SGLT2 Inhibitor–Induced Sympathoinhibition: A Novel Mechanism for Cardiorenal Protection
Source: PubMed Central journal article supplement — JACC Basic Transl Sci. 2020 Jan 29;5(2):169–79. doi: 10.1016/j.jacbts.2019.11.007 (PMC7046513; doi:10.1016/j.jacbts.2019.11.007), 2020-01-29
Supplement: mmc1.pdf [file mmc1.pdf]

**Supplemental Figure 1. Chemical denervation with 6-hydroxydopamine (6-OHDA) reduces expression of tyrosine hydroxylase in hypertensive BPH/2J.** Representative images of tyrosine hydroxylase expression in the hearts of BPH/2J control mice (A) or 6-OHDA treated mice (B). Tyrosine hydroxylase staining is indicated with arrows. Magnification 200X. (C) Quantitation of tyrosine hydroxylase expression in the hearts of BPH/2J mice, n=3-4 mice/group. Representative images of tyrosine hydroxylase expression in kidney from control mice (D) or 6-OHDA treated mice (E). Tyrosine hydroxylase staining is indicated with arrows. Magnification 200X. (F) Quantitation of tyrosine hydroxylase expression in the kidneys of BPH/2J mice, n=3-4 mice/group. \*p<0.05; All data presented as mean  $\pm$  SEM.

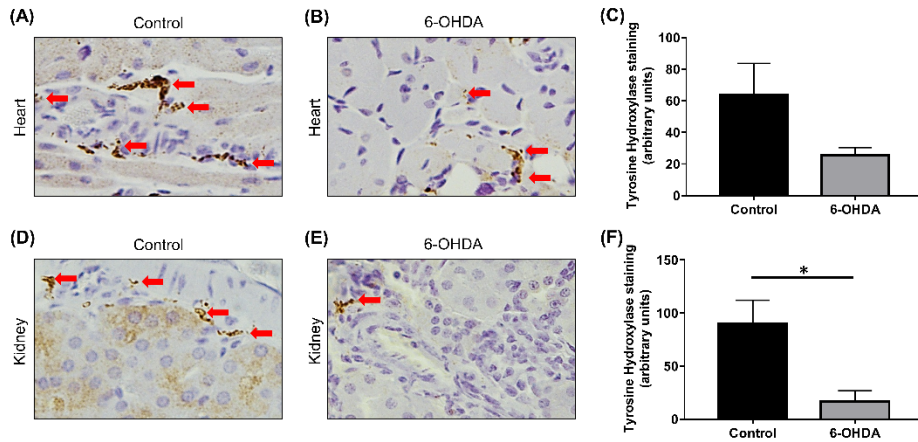

Online Figure 1

**Supplemental Figure 2. Chemical denervation with 6-hydroxydopamine (6-OHDA) reduces sodium glucose cotransporter 2 (SGLT2) expression in kidneys of hypertensive BPH/2J mice.**

Representative immunohistochemistry images of SGLT2 expression in kidneys from BPH/2J control mice (A) or 6-OHDA treated mice (B). Examples of SGLT2 staining, which was quantitated in Figure 1E, is indicated with arrows. Magnification 200X.

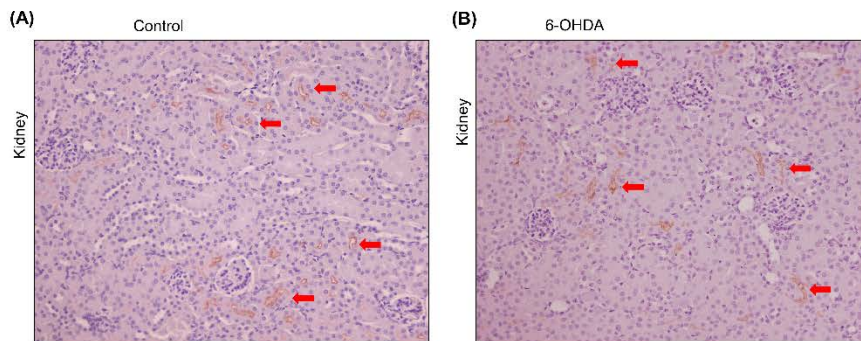

Online Figure 2

**Supplemental Figure 3. Sodium glucose cotransporter 2 (SGLT2) expression is not altered in kidneys of hypertensive BPH/2J mice after Dapagliflozin treatment.** (A) Percentage of proximal tubules expressing SGLT2 in kidneys from BPH/2J control mice or Dapagliflozin treated mice, n= 4 mice/group. (B) Intensity of staining of proximal tubules in kidneys rated on a scale of 0-3, 0=no staining, 1=low staining, 2=intermediate staining, 3=highest staining, n= 4 mice/group. All data presented as mean  $\pm$  SEM.

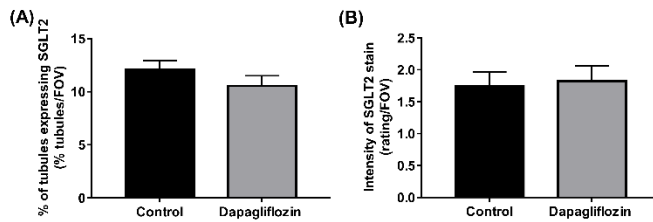

Online Figure 3

**Supplemental Figure 4. Sodium glucose cotransporter 2 (SGLT2) inhibition reduces tyrosine hydroxylase expression in the heart of hypertensive BPH/2J mice.** Quantitation of tyrosine hydroxylase staining in hearts from BPH/2J control mice or Dapagliflozin treated mice, n= 6-8 mice/group. Data presented as mean  $\pm$  SEM.

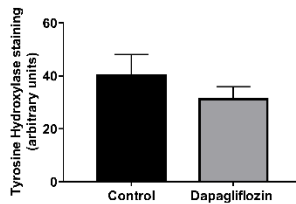

Online Figure 4

**Supplemental Figure 5. Interleukin-10 expression is elevated in hearts of hypertensive BPH/2J mice after Dapagliflozin treatment.** Interleukin-10 protein levels in hearts from BPH/2J control mice or Dapagliflozin treated mice, n= 7-10 mice/group. Data presented as mean  $\pm$  SEM.

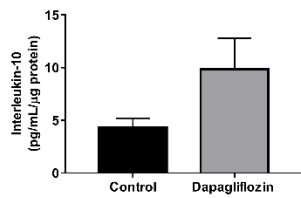

Online Figure 5

**Supplemental Figure 6. Sodium glucose cotransporter 2 (SGLT2) inhibition elevates fecal short chain fatty acids in hypertensive BPH/2J mice.** Acetate (A) and Butyric acid (B) concentrations were measured in the cecal contents of BPH/2J control mice or Dapagliflozin treated mice, n= 6-10 mice/group. All data presented as mean  $\pm$  SEM.

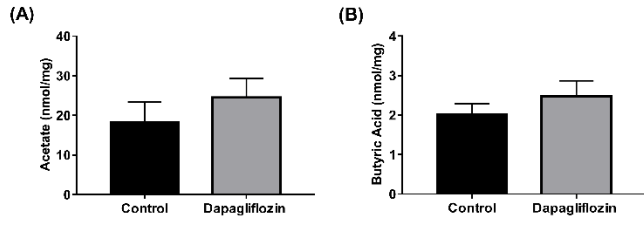

Online Figure 6
